# Supplementary material
Source: publisher figshare collection journal article supplement (https://karger.figshare.com/articles/dataset/_/5126467)
Supplement: Supplementary file 1 [file 1]

**Supplementary Table 1.** Nucleotide sequence identities of the kW1 sequence fragments from 8 avian species and 1 crocodilian species with the coding region of the integrase of American alligator *Polinton* DNA transposon (the Polinton-1\_AMi sequence)

| kW1 sequence fragments                                             | Length of DNA fragment, bp | Nucleotide sequence identity, % <sup>a</sup> |
|--------------------------------------------------------------------|----------------------------|----------------------------------------------|
| <i>Casuarius casuarius</i> w1-k7 fragment, chromosome Z            | 286                        | 71.3 (204/286)                               |
| <i>Dromaius novaehollandiae</i> w1-k7 fragment, chromosome Z       | 295                        | 74.2 (219/295)                               |
| <i>Pterocnemia pennata</i> w1-k7 fragment, chromosome Z            | 289                        | 62.6 (181/289)                               |
| <i>Struthio camelus</i> w1-k7 fragment, chromosome Z               | 294                        | 70.7 (208/294)                               |
| <i>Apteryx australis manteui</i> kW1 sequence <sup>b</sup>         | 676                        | 73.1 (494/676)                               |
| <i>Eudromia elegans</i> w1-k7 fragment, chromosome W               | 271                        | 62.0 (168/271)                               |
| <i>Bubo blakistoni</i> w1-k7 fragment, chromosome Z                | 280                        | 65.0 (182/280)                               |
| <i>Bubo blakistoni</i> w1-k7 fragment, chromosome W                | 295                        | 73.6 (217/295)                               |
| <i>Nisaetus nipalensis orientalis</i> w1-k7 fragment, chromosome Z | 288                        | 67.0 (193/288)                               |
| <i>Nisaetus nipalensis orientalis</i> w1-k7 fragment, chromosome W | 295                        | 72.2 (213/295)                               |
| <i>Crocodylus siamensis</i> w1-k7 fragment                         | 285                        | 90.5 (258/285)                               |

<sup>a</sup> The numbers in parentheses indicate identical bases of the integrase of the American alligator *Polinton* DNA transposon/the number of bases of the kW1 sequences. Identities are calculated including nucleotide sequence gaps.

<sup>b</sup> Nucleotide sequence was taken from Huynen et al. [2002] (AF308932).
