# Supplementary material
Source: publisher figshare collection journal article supplement (https://karger.figshare.com/articles/dataset/_/5126467)
Supplement: Supplementary file 2 [file 1 › 000362479_sm_Figures.pdf]

## Supplementary figures

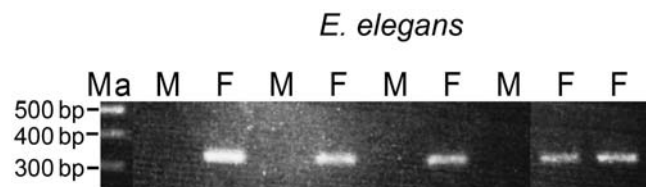

**Fig. 1.** PCR amplification of kW1 sequence fragments in *Eudromia elegans*. 4 males and 5 females, which were different from the individuals shown in figure 1, were used in this experiment.

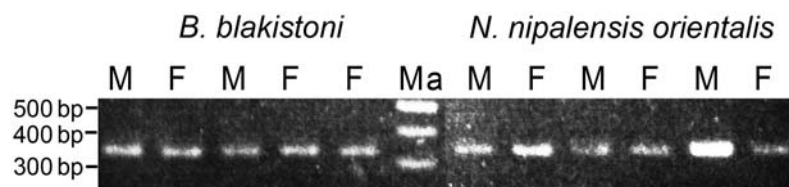

**Fig. 2.** PCR amplification of kW1 sequence fragments in *Bubo blakistoni* and *Nisaetus nipalensis orientalis*. 2 males and 3 females of *B. blakistoni* and 3 males and 3 females of *N. nipalensis orientalis*, which were different from the individuals shown in figure 1, were used in this experiment.
